# Supplementary material for: Uptake of the Siderophore Triacetylfusarinine C, but Not Fusarinine C, Is Crucial for Virulence of Aspergillus fumigatus
Source: PubMed Central journal article supplement (PMC9600649; doi:10.1128/mbio.02192-22), 2022-09-20

**A**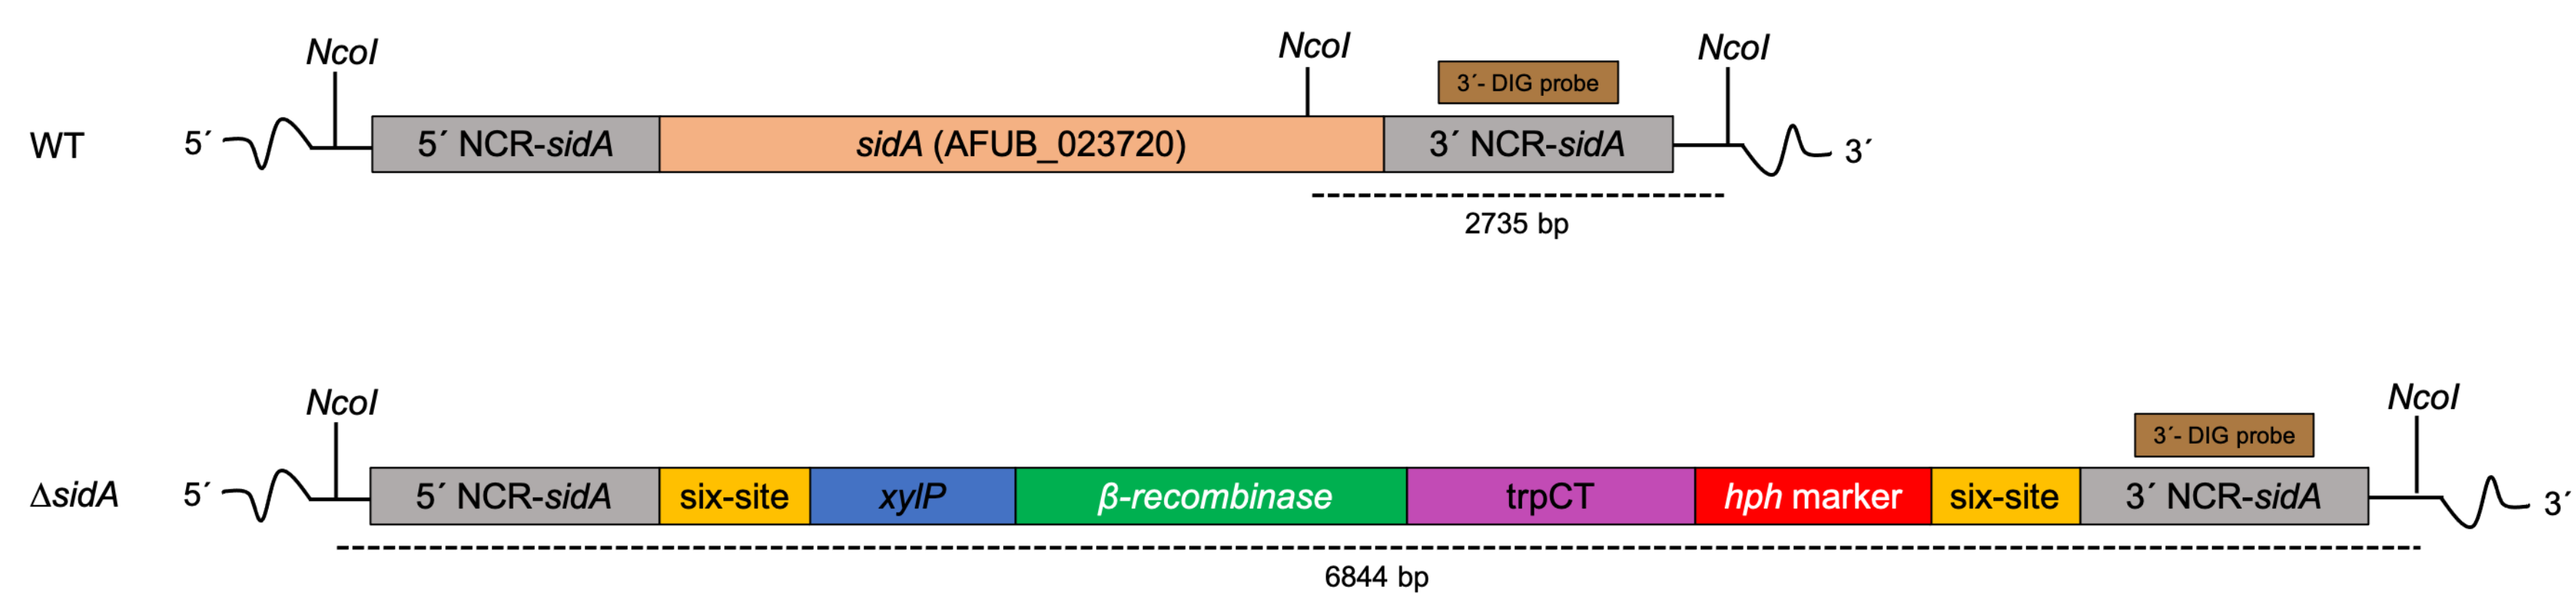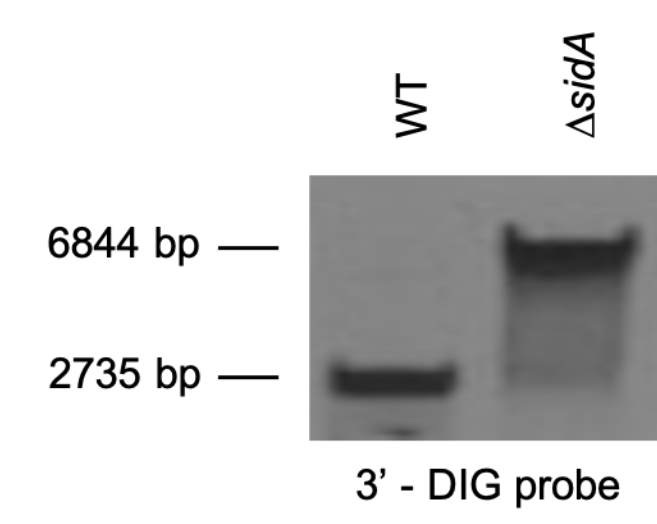**B**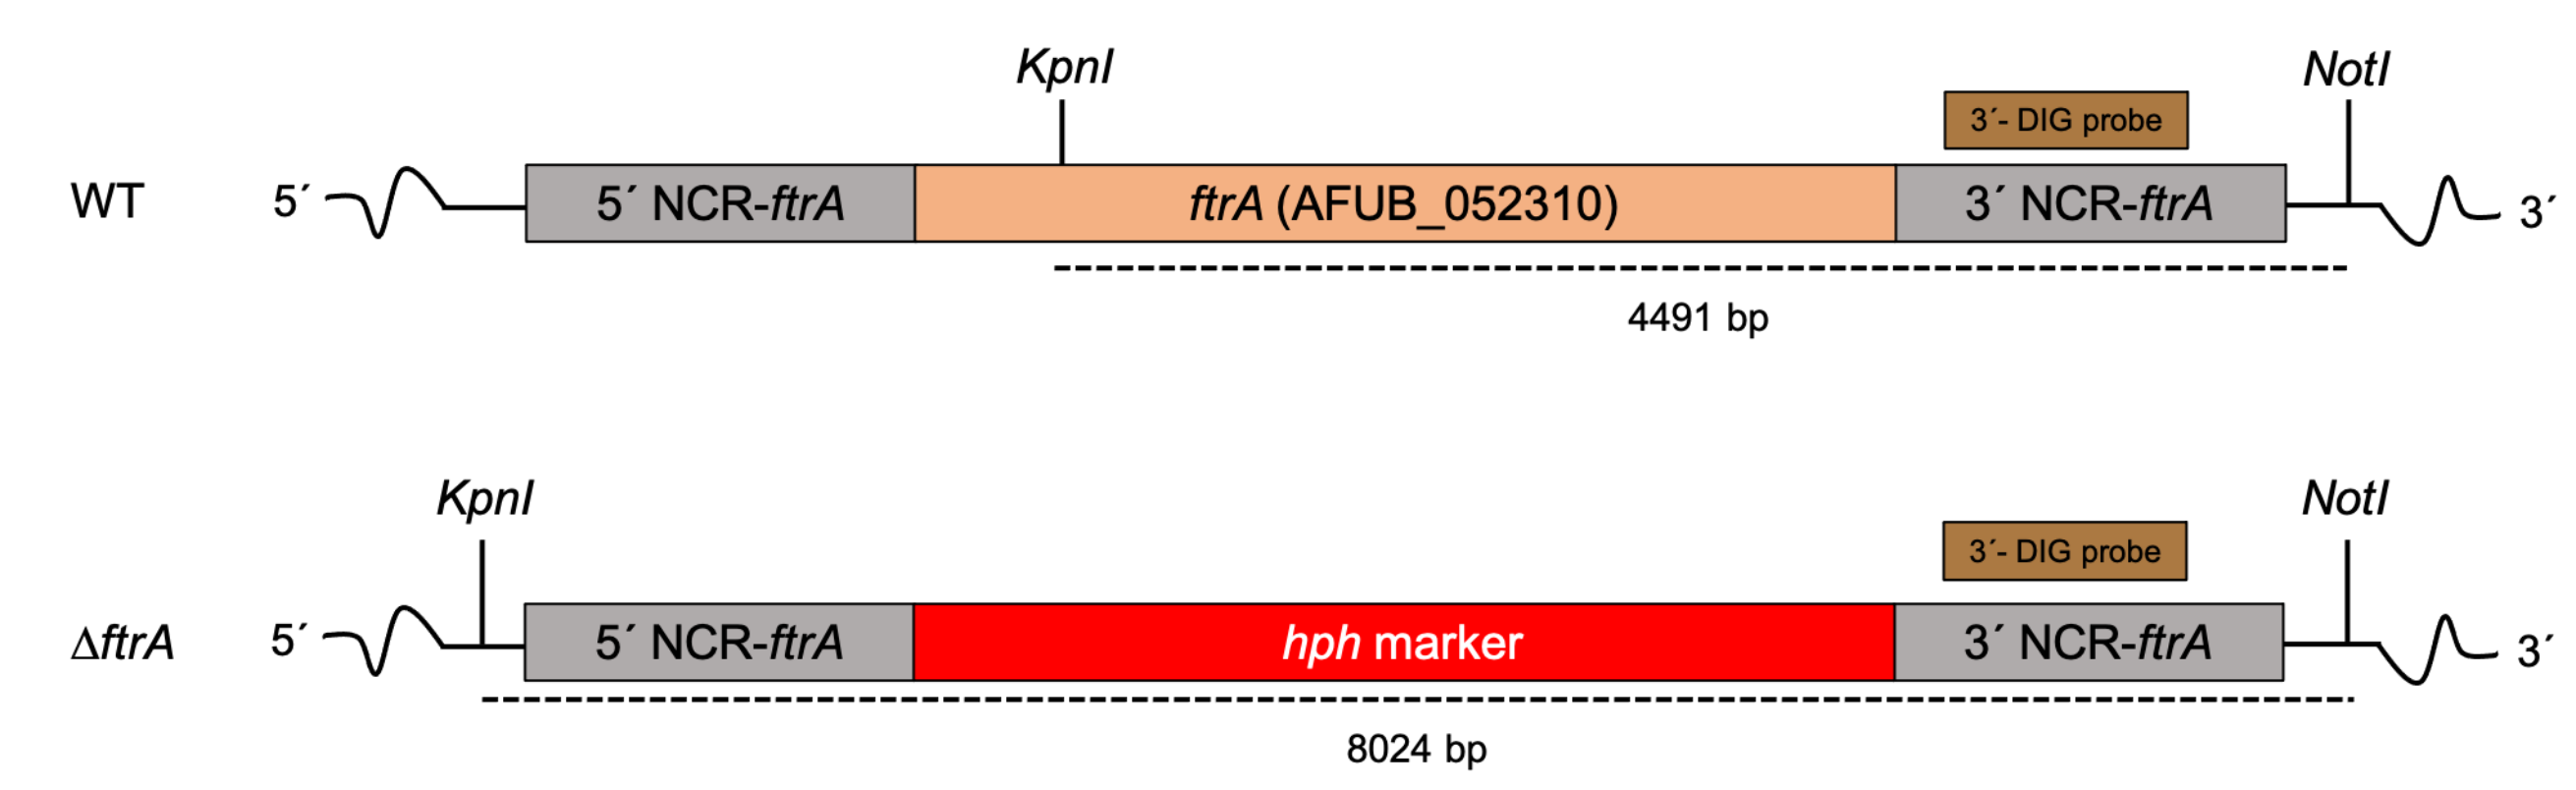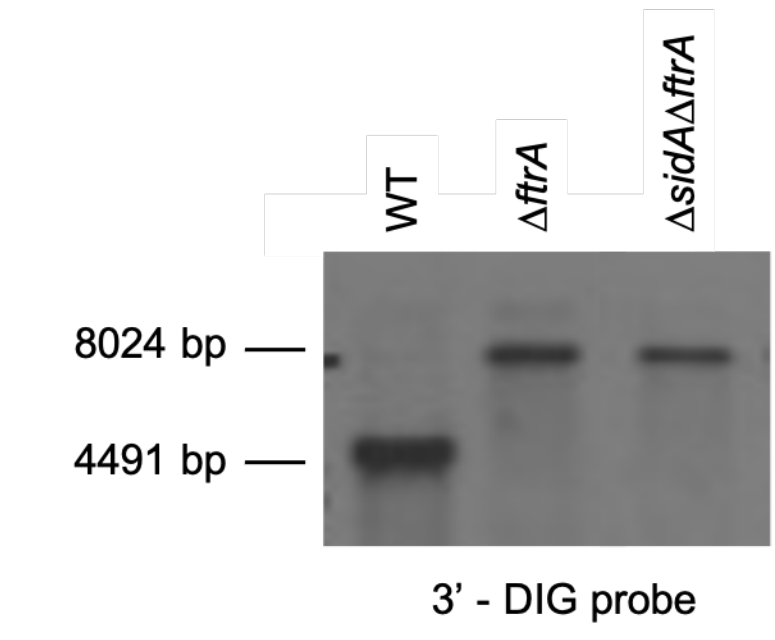**C**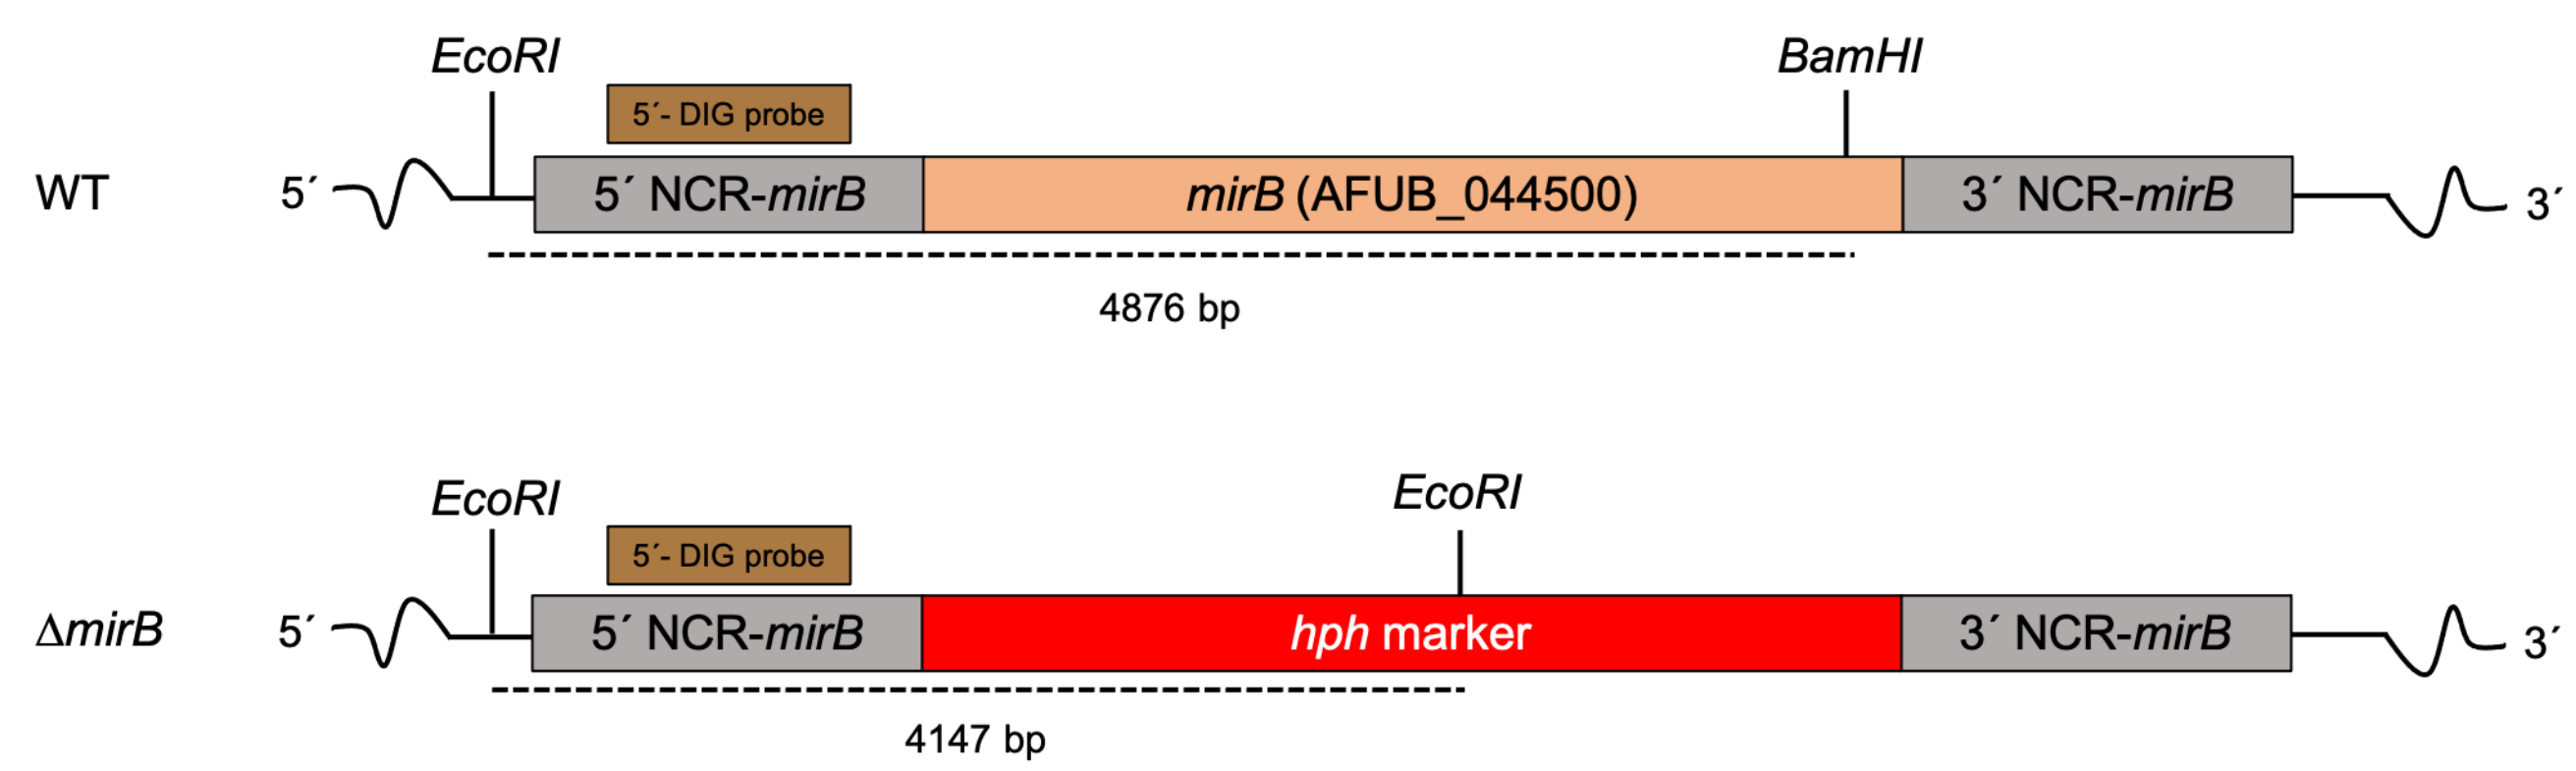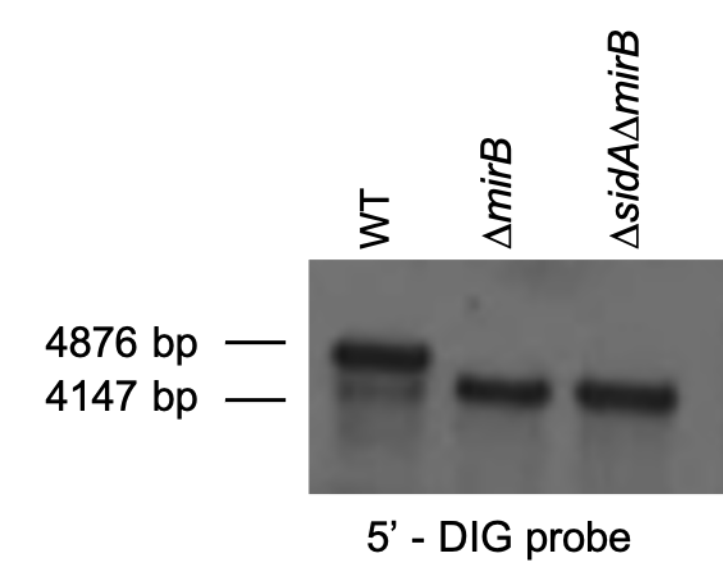**D**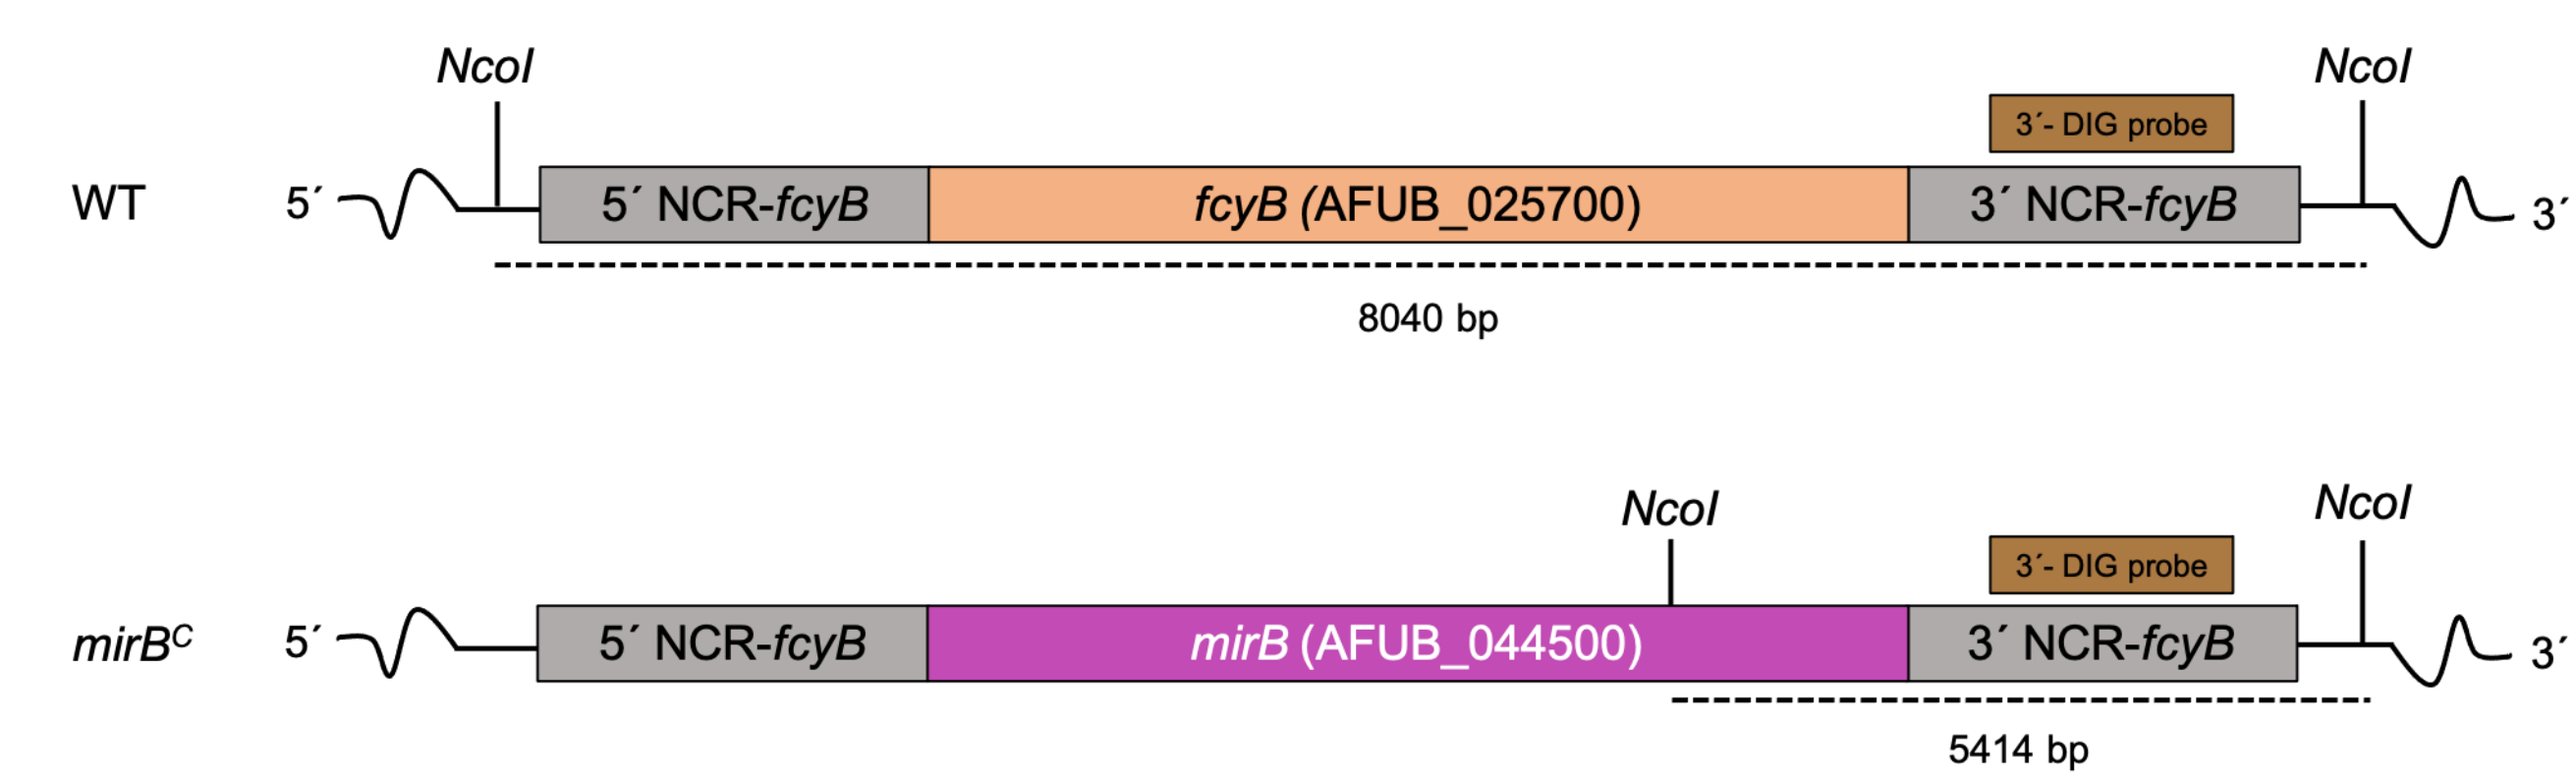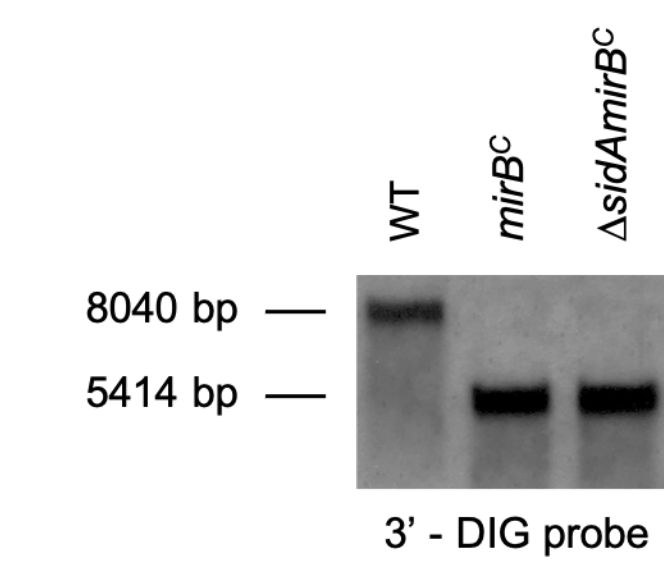**E**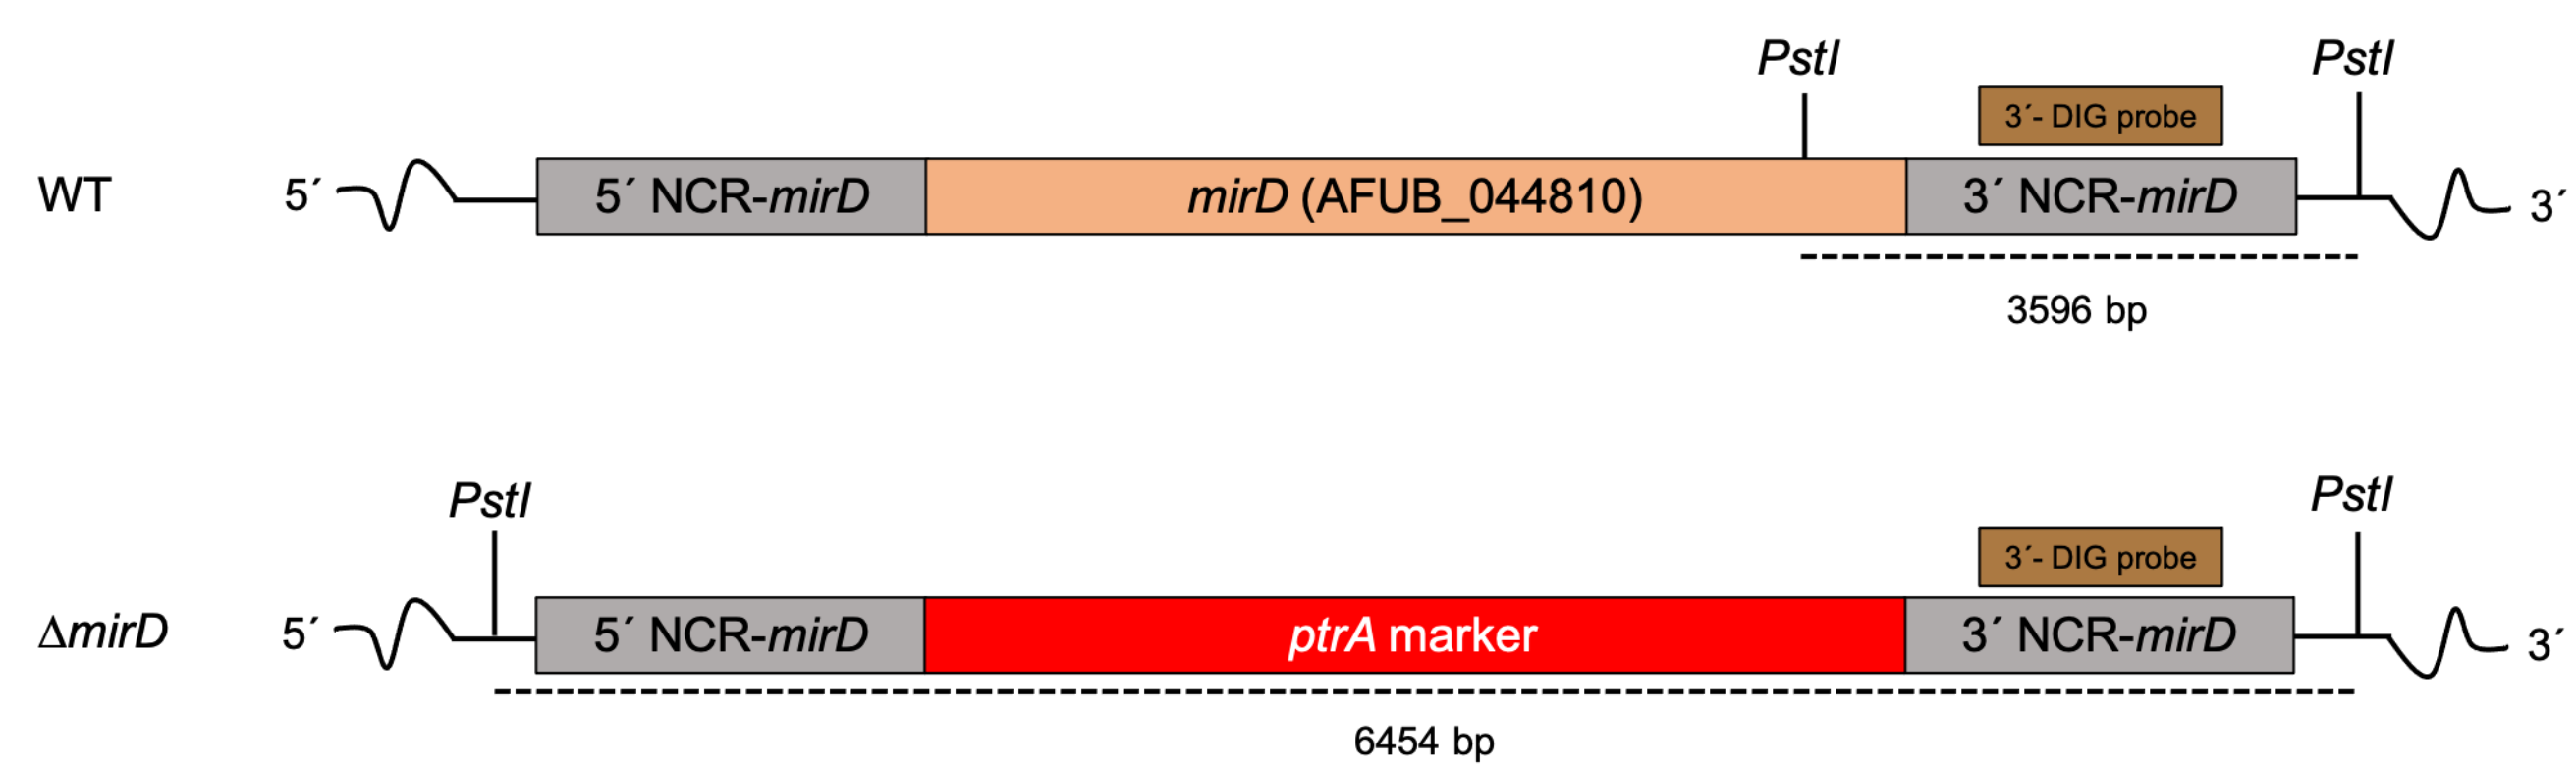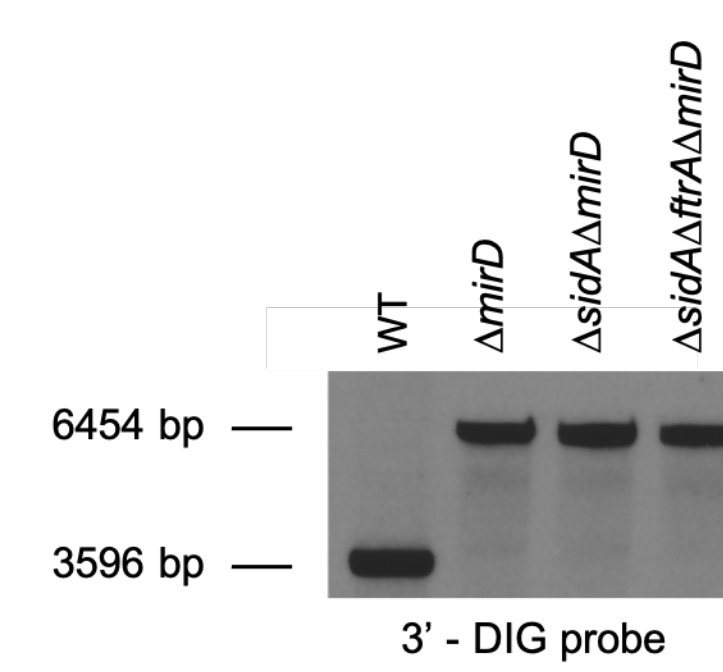**F**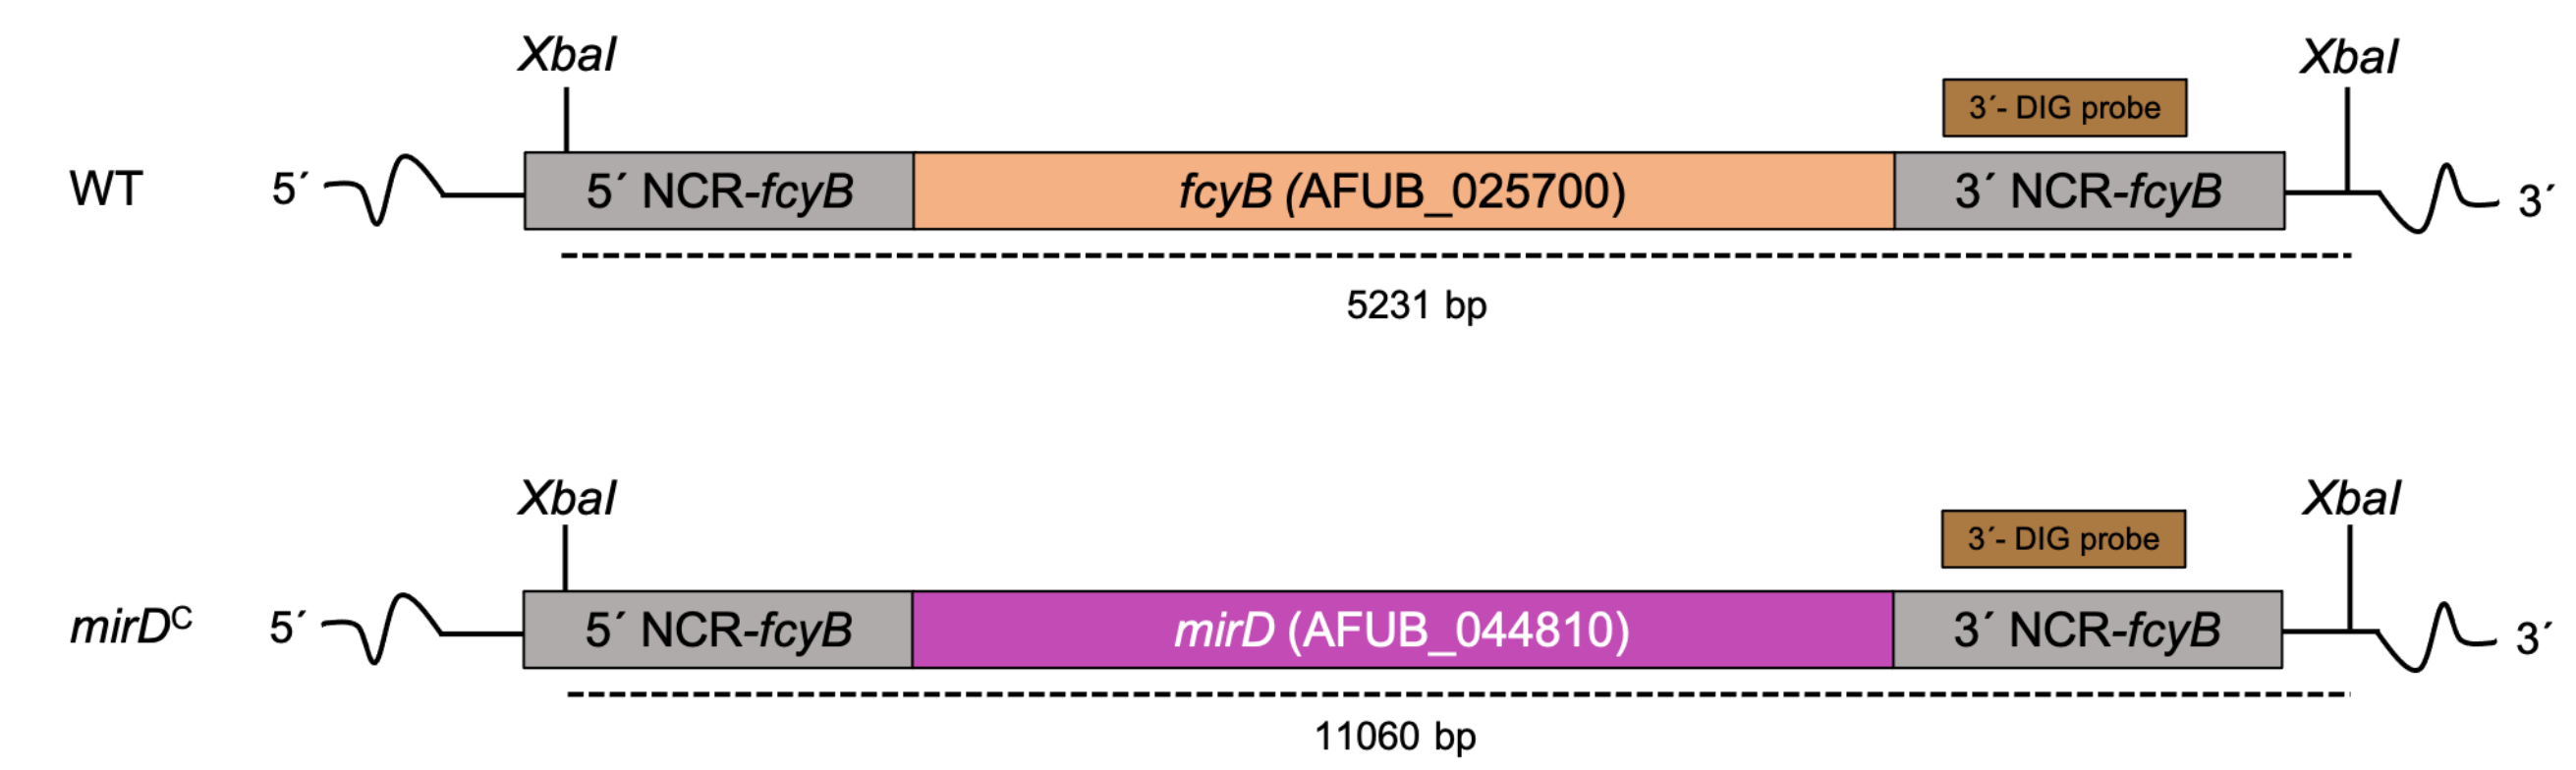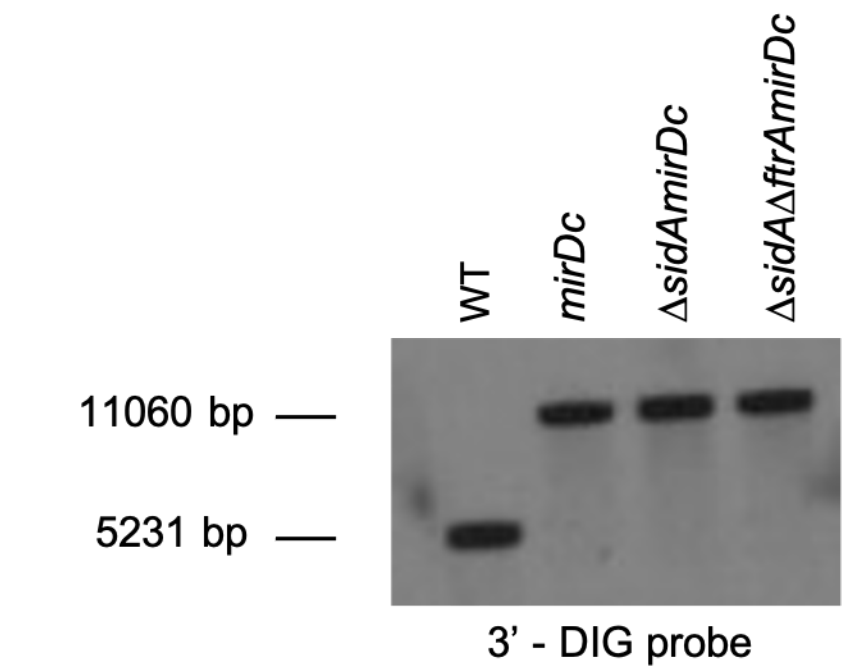

Supplement: mbio.02192-22-s0001.pdf [file mbio.02192-22-s0001.pdf]
